# Supplementary material for: LncRNA SNHG17 promotes tumor progression and predicts poor survival in human renal cell carcinoma via sponging miR-328-3p
Source: publisher site journal article supplement (doi:10.18632/aging.203440), 2021-09-08
Supplement: Supplementary file [file aging-v13i17-203440-supplementary-material-SD2.pdf]

## SUPPLEMENTARY TABLES

**Supplementary Table 1. Clinicopathologic characteristics of the renal cell carcinoma patients.**

| Parameters           |    | %    |
|----------------------|----|------|
| Age, years           |    |      |
| <55                  | 37 | 43.4 |
| ≥55                  | 47 | 56.6 |
| Gender               |    |      |
| Male                 | 53 | 69.7 |
| Female               | 31 | 30.3 |
| Pathological T stage |    |      |
| pT1 + pT2            | 51 | 60.7 |
| pT3 + pT4            | 33 | 39.3 |
| Pathological N stage |    |      |
| pN0                  | 57 | 67.9 |
| pN1                  | 27 | 32.1 |
| Distant metastasis   |    |      |
| No                   | 74 | 88.1 |
| Yes                  | 10 | 11.9 |
| TNM Stage            |    |      |
| I                    | 8  | 9.5  |
| II                   | 38 | 45.2 |
| III                  | 28 | 33.3 |
| IV                   | 10 | 11.9 |
| Grade                |    |      |
| 1 + 2                | 67 | 79.8 |
| 3 + 4                | 16 | 19.0 |

**Supplementary Table 2. Primers for qRT-PCR.**

|        | Forward premier (5'–3') | Reverse premier (5'–3') |
|--------|-------------------------|-------------------------|
| H2AX   | CGGCAATGCTGGAGTACCTCA   | AGCTCCTCCTCGTTGCGGATG   |
| GAPDH  | GGTGAAGGTCGGAGTCAACGG   | GAGGTCAATGAAGGGGTCATTG  |
| U6     | GCTTCGGCAGCACATATACT    | GTGCAGGGTCCGAGGTATTC    |
| SNHG17 | AGAGAATGGAGAGTGAGGCTACC | CCAGGCATGGACAGAGGGAT    |
